# Supplementary material for: Mass spectrometry-based identification of a B-cell maturation antigen-derived T-cell epitope for antigen-specific immunotherapy of multiple myeloma
Source: PubMed Central journal article supplement (PMC7048774; doi:10.1038/s41408-020-0288-3), 2020-02-28
Supplement: 41408_2020_288_MOESM1_ESM.pdf [file 41408_2020_288_MOESM1_ESM.pdf]

**Supplemental Table 1: Results overview of T-cell experiments using cells of healthy volunteers**

| Healthy volunteer ID | Mean frequency of P(BCMA) <sub>B*18</sub> -specific CD8 <sup>+</sup> T cells | Multifunctionality of peptide-specific T cells                 |
|----------------------|------------------------------------------------------------------------------|----------------------------------------------------------------|
| HV01                 | 0.76%                                                                        | IFN $\gamma$ <sup>+</sup> TNF <sup>+</sup> CD107a <sup>+</sup> |
| HV02                 | 0.71%                                                                        | IFN $\gamma$ <sup>+</sup> TNF <sup>+</sup> CD107a <sup>+</sup> |
| HV03                 | 0.40%                                                                        | IFN $\gamma$ <sup>+</sup> TNF <sup>+</sup> CD107a <sup>+</sup> |
| HV04                 | 0.22%                                                                        | IFN $\gamma$ <sup>+</sup> TNF <sup>+</sup> CD107a <sup>+</sup> |
| HV05                 | 2.01%                                                                        | IFN $\gamma$ <sup>+</sup> TNF <sup>+</sup> CD107a <sup>+</sup> |
| HV06                 | 0.99%                                                                        | not tested                                                     |
| HV07                 | 1.42%                                                                        | not tested                                                     |
| HV08                 | 0.74%                                                                        | not tested                                                     |
| HV09                 | 0.40%                                                                        | not tested                                                     |
| HV10                 | 0.42%                                                                        | not tested                                                     |

Results of T-cell-based assays using cells of HVs. Mean frequency of *de novo* induced P(BCMA)<sub>B\*18</sub>-specific CD8<sup>+</sup> T cells using *in vitro* aAPC-based priming experiments and assessment of cytokine production as well as CD107a expression using intracellular cytokine staining of peptide-specific cells.

Abbreviations: ID, identification; HV, healthy volunteer.

**Supplemental Table 2: Peptides used for T-cell experiments**

| Peptide ID                  | Gene name of source protein | Peptide sequence | Position      | HLA restriction |
|-----------------------------|-----------------------------|------------------|---------------|-----------------|
| P(BCMA) <sub>B*18</sub>     | BCMA                        | DEIILPRGL        | 111 - 119     | B*18            |
| P(negative) <sub>B*18</sub> | ANM1                        | DEVRTLTY         | 69 - 76       | B*18            |
| P(positive) <sub>B*18</sub> | MUC16                       | TETETAIHVF       | 9 507 - 9 515 | B*18            |

HLA-B\*18-restricted BCMA-derived peptides as well as positive and negative control peptides used for IFN $\gamma$  ELISPOT assays and aAPC-based *in vitro* priming experiments. Abbreviations: ID, identification; aAPC, artificial antigen-presenting cell.

**Supplemental Table 3: Patient characteristics**

| UPN | Experiment | Sex    | Age | ISS stage | Durie & Salmon | Cytogenetic risk | HLA class I typing                 |
|-----|------------|--------|-----|-----------|----------------|------------------|------------------------------------|
| 1   | E, P       | male   | 72  | 1         | 3A             | unknown          | A*03:01, A*33:01, B*14:02, B*18:01 |
| 2   | E          | male   | 74  | 1         | 2A             | low-risk         | A*24:02, A*66:02, B*15:09, B*18:01 |
| 3   | E          | female | 73  | 3         | 3B             | high-risk        | A*02:01, A*11:01, B*15:01, B*18:01 |
| 4   | E, P       | male   | 53  | 3         | 3A             | high-risk        | A*03:01, A*11:01, B*18:01, B*35:01 |

Patients included in T-cell-based assays. Age is given in years at time of sample collection. Cytogenetic risk was assessed according to the International Myeloma Working Group (IMWG) risk stratification (Chng *et al.*, 2014, Leukemia). Abbreviations: UPN, uniform patient number; E, IFN $\gamma$  ELISPOT; P, aAPC-based priming; ISS, International Staging System.
